# Supplementary material for: Benefits, barriers and opinions on multidisciplinary team meetings: a survey in Swedish cancer care
Source: Springer Nature journal article supplement (doi:10.1186/s12913-018-2990-4), 2018-04-05
Supplement: MOESM1 [file 15593834]

## **Purpose**

**During 2016 Regional Cancer Centre South had an assignment to work for equal access to multidisciplinary team meetings (MDTM). We have identified you as a member of a MDT through mapping the MDTM in the south health care region.**

**The purpose is to increase the knowledge, investigate MDT member's experiences and collect data on resources spent. We kindly ask you to fill in this questionnaire which takes 5-10 minutes. Received answers will be anonymously handled and all participants will get the opportunity to take part of the final rapport.**

**Please accept our thanks in advance!**

***Mef Nilbert*, Head of Operations, Regional Cancer Centre South**

***Linn Rosell*, Health Care Development Officer, Regional Cancer Centre South**

## Questions about yourself and the time spent on MDTM

1. Age;

2. Gender;

- Male
- Female
- Wish not to define

3. Profession;

- Resident physician
- Specialist physician
- Nurse
- Secretary/coordinator
- None of the above, please define (e.g. assistant physician, social worker, physiotherapist, occupational therapist);

4. If you work as a nurse, do you have any of the assignment listed below?

- Contact nurse
- Research nurse
- None of the above, please define;

5. Specialisation;

- Surgery (including urology, orthopaedics, thoracic surgery, gynaecology)
- Medicine (including respiratory medicine, haematology, oncology, neurology)
- Radiology (including nuclear medicine, clinical physiology)
- Pathology/cytology
- None of the above, please define;

6. Country council where I work;

- Region Skåne
- Region Kronoberg
- Region Halland
- Blekinge county council
- None of the above, please define;

7. How many MDTMs do you participate weekly?

- 1
- 2
- $\geq 3$
- Don't know

8. What type of MDTM do you participate in? (More than one alternative can be marked)

- Local
- Regional
- National
- None of the above, please define;

9. How much time do you spend on MDTM per week regarding; (Specify in half and full hours)

Preparation?

Participation?

Post-MDTM work?

10. Do you find the time allocated to MDTM to be sufficient?

Yes

No

Don't know

If no, please motivate;







15. When your team can not reach a treatment recommendation, which are the most common barriers?  
(Choose maximum **3** alternatives)

- Insufficient pathology
- Insufficient radiology
- Need for supplementary investigations
- Insufficient information on comorbidity
- Insufficient information on patient preferences
- Patient has other preferences
- No professional present has seen the patient
- Absence of key professionals
- Disagreement
- Complex cases
- Insufficient teamwork
- Insufficient leadership
- Insufficient preparations
- Lack of time
- Interruption or distraction
- Don't know
